# Supplementary material for: Molecular Characterization of AMPA-Receptor-Containing Vesicles
Source: Frontiers journal article supplement (doi:10.3389/fnmol.2021.754631), 2021-10-15
Supplement: Data_Sheet_1.PDF [file Data_Sheet_1.PDF]

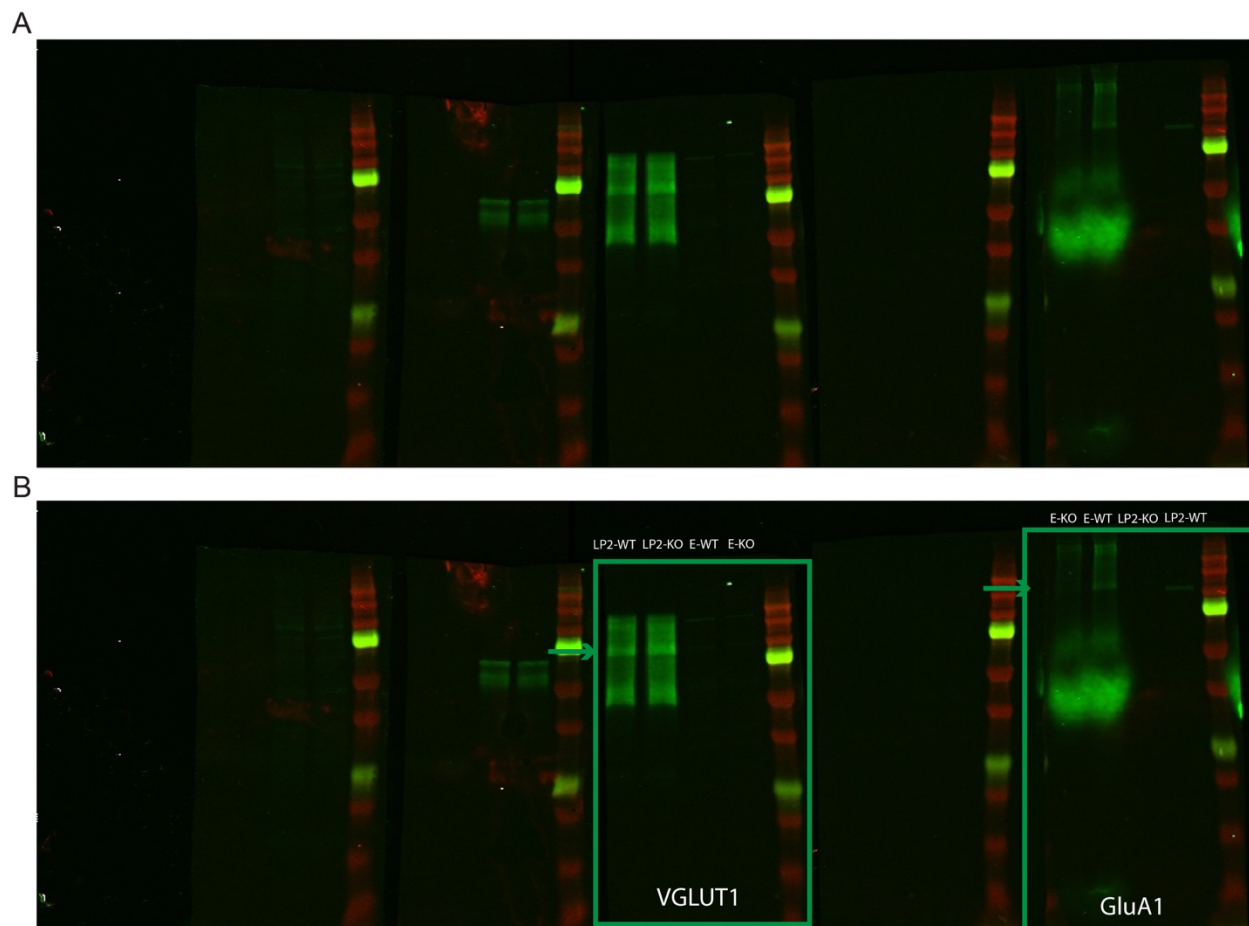

*Supplementary Figure 1. Source Data for Figure 1B.*

**(A)** Unaltered Western blots. **(B)** Western blots with lanes labelled and relevant bands labelled (green arrows).
