# Supplementary material for: Molecular Characterization of AMPA-Receptor-Containing Vesicles
Source: Frontiers journal article supplement (doi:10.3389/fnmol.2021.754631), 2021-10-15
Supplement: Data_Sheet_2.PDF [file Data_Sheet_2.PDF]

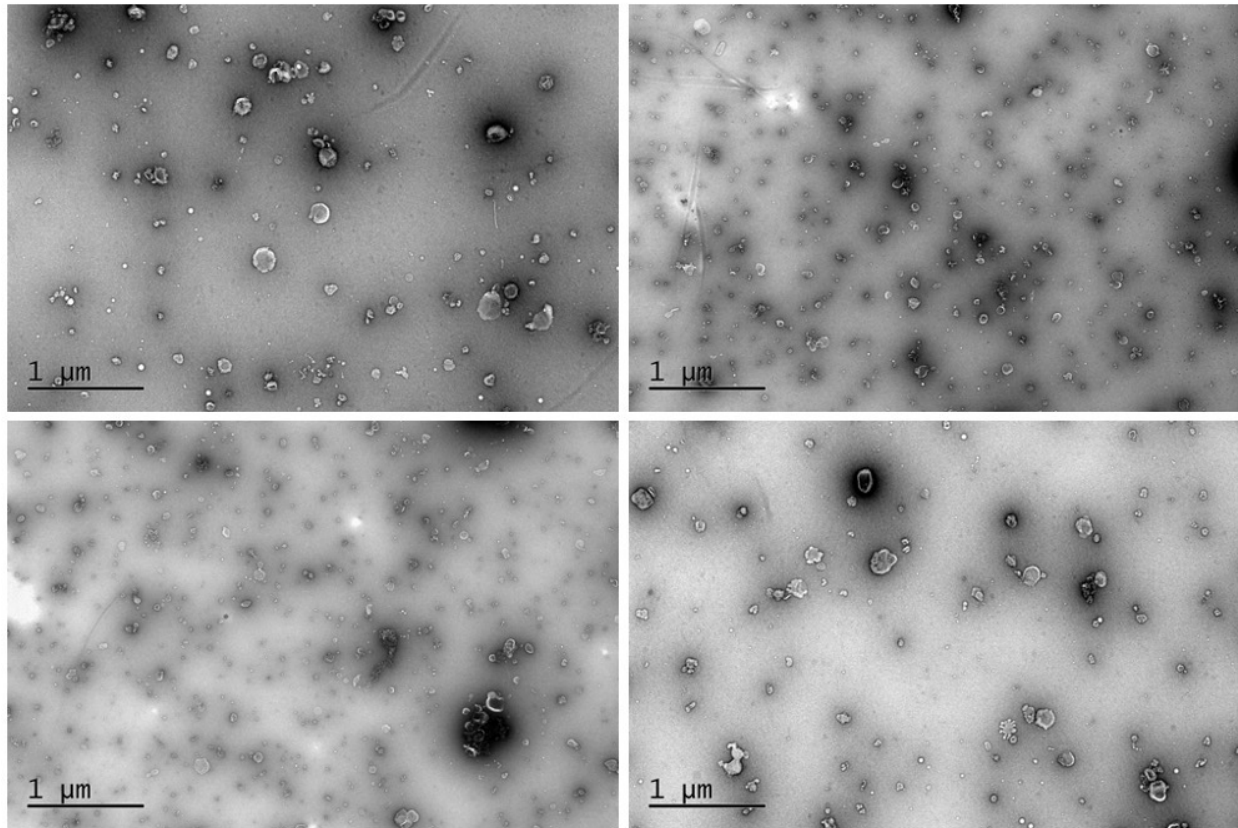

*Supplementary Figure 2. Additional examples of negative stain electron microscopy images of GluA1 peptide eluate of wildtype mice (5000x magnification). Additional images are provided in supplementary files.*
